# Supplementary material for: Sorafenib for the Treatment of Unresectable Hepatocellular Carcinoma: Preliminary Toxicity and Activity Data in Dogs
Source: MDPI journal article supplement (doi:10.3390/cancers12051272), 2020-05-18
Supplement: s1 [file s1]

*Article*

# **Sorafenib for the Treatment of Unresectable Hepatocellular Carcinoma: Preliminary Toxicity and Activity Data in Dogs**

**Laura Marconato, Silvia Sabattini, Giorgia Marisi, Federica Rossi, Vito Ferdinando Leone and Andrea Casadei-Gardini**

Questionnaire for evaluating health-related quality-of-life in 13 dogs with advanced hepatocellular carcinoma receiving metronomic chemotherapy or sorafenib. Parameters included behavior (questions 1, 4, and 7), activity (questions 2, 6 and 8), appetite (question 5), and pain (question 3). The questionnaire was scored at baseline and during treatment, and differences were statistically assessed.

**1. How much attention is your dog giving to the family?**

- Totally indifferent (3 points)
- Decreased attention (2 points)
- Attention has not changed (1 point)

**2. Is your pet still active?**

- My pet lays in one place all day long (3 points)
- Occasionally (2 points)
- My pet moves and plays in a normal way (1 point)

**3. How is your dog sleeping?**

- Very badly/Not sleeping at all (3 points)
- Intermittently (2 points)
- Normally (1 point)

**4. Does your dog keep its hygienic habits (i.e., does your dog clean itself)?**

- No (3 points)
- Less than before (2 points)
- Yes (1 point)

**5. Does your dog have an appetite?**

- No (3 points)
- Little, it needs to be forced (2 points)
- Normal (1 point)

**6. Does your dog show any of the following signs: propulsive circling, head pressing, aimless wandering, weakness, ataxia, amaurosis (unexplained blindness), behavior change (e.g., aggression), collapse, seizures?**

- Yes (3 points)
- Occasionally (2 points)
- No (1 point)

**7. How is your dog's mood?**

Totally altered (3 points)  
A bit depressed (2 points)  
Normal (1 point)

**8. Does your dog get tired easily?**

Yes, always (3 points)  
Frequently (2 points)  
No (1 point)

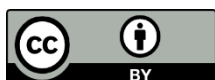

© 2019 by the authors. Licensee MDPI, Basel, Switzerland. This article is an open access article distributed under the terms and conditions of the Creative Commons Attribution (CC BY) license (<http://creativecommons.org/licenses/by/4.0/>).
